# Supplementary material for: Peak Oxygen Uptake on Cardiopulmonary Exercise Test Is a Predictor for Severe Arrhythmic Events during Three-Year Follow-Up in Patients with Complex Congenital Heart Disease
Source: MDPI journal article supplement (doi:10.3390/jcdd9070215), 2022-07-04
Supplement: s1 [file s1]

## **Supplement Material**

**Table S1: Clinical parameters associated with SAE in univariable and multivariable**

### **Cox-regression analysis.**

|                                                 | Univariable analysis |              |         | Multivariable analysis |             |         |
|-------------------------------------------------|----------------------|--------------|---------|------------------------|-------------|---------|
| Variable                                        | HR                   | 95% CI       | P-value | HR                     | 95% CI      | P-value |
| Base data                                       |                      |              |         |                        |             |         |
| Age [per additional year]                       | 1.042                | 1.027-1.056  | <0.001  | 1.023                  | 1.006-1.041 | 0.009   |
| BMI [per 1kg/m <sup>2</sup> increase]           | 1.062                | 1.022-1.104  | 0.002   |                        |             |         |
| Gender [female]                                 | 1.071                | 0.718-1.595  | 0.739   |                        |             |         |
| CPET                                            |                      |              |         |                        |             |         |
| $\dot{V}O_{2peak}$ [per 1 ml/min/kg decrease]   | 1.078                | 1.078-1.105  | <0.001  | 1.056                  | 1.025-1.087 | <0.001  |
| $\dot{V}O_{2at}$ [per 1 ml/min/kg decrease]     | 1.101                | 1.056-1.148  | <0.001  |                        |             |         |
| $\dot{V}E/\dot{V}CO_{2-slope}$ [per 1 increase] | 1.008                | 0.974-1.043  | 0.657   |                        |             |         |
| RERmax [per 1 increase]                         | 2.147                | 0.285-16.202 | 0.459   |                        |             |         |
| SpO <sub>2</sub> max [per 1% decrease]          | 1.004                | 0.971-1.038  | 0.798   |                        |             |         |
| CHD                                             |                      |              |         |                        |             |         |
| UVH                                             | 0.926                | 0.555-1.545  | 0.769   |                        |             |         |
| EBS                                             | 0.642                | 0.370-1.114  | 0.115   |                        |             |         |
| TOF                                             | 0.862                | 0.576-1.290  | 0.470   |                        |             |         |
| TAC                                             | 4.608                | 0.643-33.051 | 0.129   |                        |             |         |
| TGA ASO                                         | 1.642                | 0.796-3.385  | 0.179   |                        |             |         |
| TGA SM                                          | 1.123                | 0.638-1.979  | 0.687   |                        |             |         |

SAE: Severe arrhythmic event, HR: Hazard-ratio, CI: Confidence-Interval, BMI: Body mass index, CPET: Cardiopulmonary exercise testing,  $\dot{V}O_{2peak}$ : Oxygen uptake at peak exercise,  $\dot{V}O_{2at}$ : Oxygen uptake at anaerobic threshold,  $\dot{V}E/\dot{V}CO_2$ -slope: Estimated ventilatory efficiency, RERmax: Respiratory exchange ratio at peak exercise,  $SpO_2max$ : Pulse oxymetric saturation at peak exercise, UVH: Univentricular heart, EBS: Ebsteins disease, TOF: Tetralogy of Fallot, TAC: Truncus arteriosus communis, TGA: Transposition of the great arteries, ASO: arterial switch operation, SM: Senning/Mustard. Individual CHD subgroups were compared to a composite of the remaining CHD. Variables with a p-value of less than 0.10 in univariable analysis were included to the multivariable model and underwent backwards stepwise regression,  $\dot{V}O_{2at}$  was excluded from multivariable analysis, due to correlation with  $\dot{V}O_{2peak}$ .

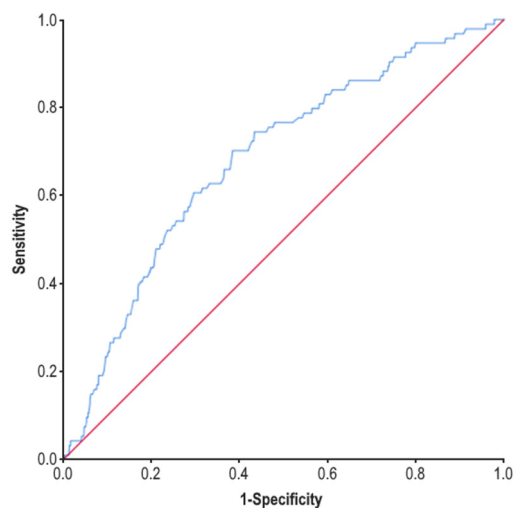

**Figure S1: ROC curve for prediction of SAE via  $\dot{V}O_{2peak}$  in CHD.**

ROC: receiver operating characteristic, SAE: Severe arrhythmic event,  $\dot{V}O_{2peak}$ : peak oxygen uptake, CHD: Congenital heart disease.

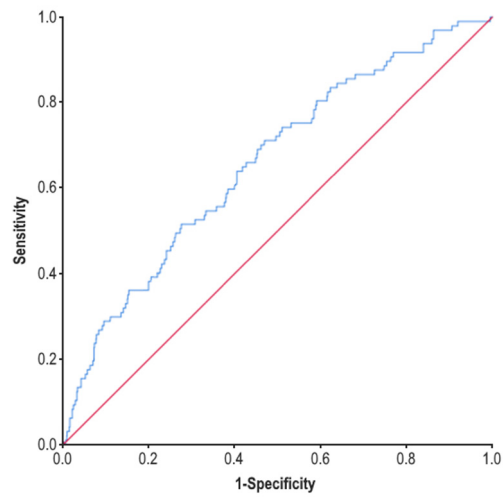

**Figure S2: ROC curve for prediction of SAE via age in CHD.**

ROC: receiver operating characteristic, SAE: Severe arrhythmic event, CHD: Congenital heart disease.
